# Supplementary material for: Intense Light-Mediated Circadian Cardioprotection via Transcriptional Reprogramming of the Endothelium
Source: PubMed Central journal article supplement — Cell Rep. Author manuscript; Available in PMC 2019 Aug 24. (PMC6708043; doi:10.1016/j.celrep.2019.07.020), 2019-08-06
Supplement: NIHMS1536798-supplement-1.pdf [file NIHMS1536798-supplement-1.pdf]

**Cell Reports, Volume 28**

**Supplemental Information**

**Intense Light-Mediated Circadian**

**Cardioprotection via Transcriptional**

**Reprogramming of the Endothelium**

**Yoshimasa Oyama, Colleen M. Bartman, Stephanie Bonney, J. Scott Lee, Lori A. Walker, Jun Han, Christoph H. Borchers, Peter M. Buttrick, Carol M. Aherne, Nathan Clendenen, Sean P. Colgan, and Tobias Eckle**

# Figure S1

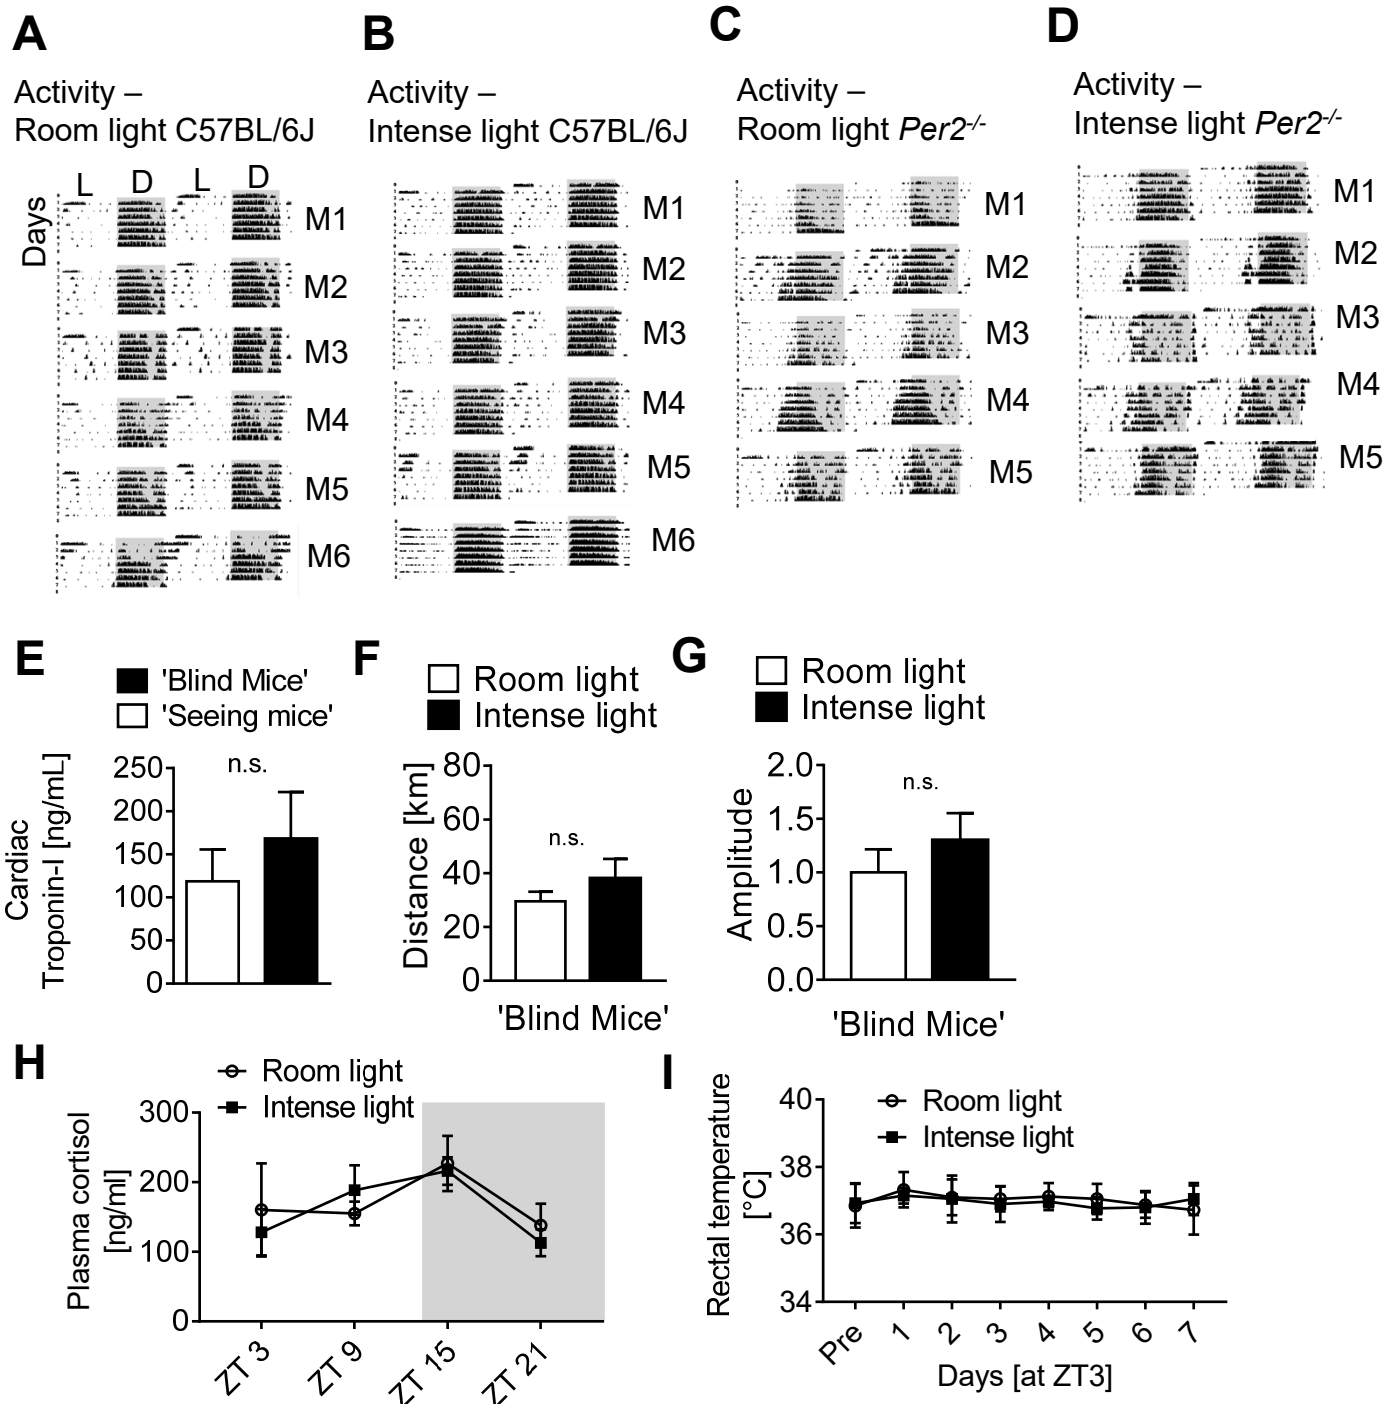

**Figure S1. Related to Figure 1. (A-D)** 7 day wheel running activity graphs (double-plotted) from wildtype or *Per2*<sup>-/-</sup> mice exposed to 7 days room light versus 7 days intense light (mean±SD, n=5-6, M=mouse, L=light phase, D=dark phase, double-plotted actograms, **Note:** numbers on the left indicate days. **(E)** Cumulative cardiac troponin measurements (ZT3+ZT15) from 'seeing' compared to enucleated 'blind' wildtype mice subjected to 60 min ischemia and 2 h reperfusion (mean±SD, n=7); **(F-G)** Wheel running measurements during 7 days of room light or intense light housing conditions in 'blind' C57BL/6J mice (mean±SD; n=4). **(H)** Plasma cortisol levels after 7 days of room or intense light exposure in C57BL/6J mice (mean±SD, n=5, **(I)** Rectal temperatures during 7 days of room light or intense light at ZT3 in C57BL/6J mice (mean±SD; n=4).



# Figure S2

**A**

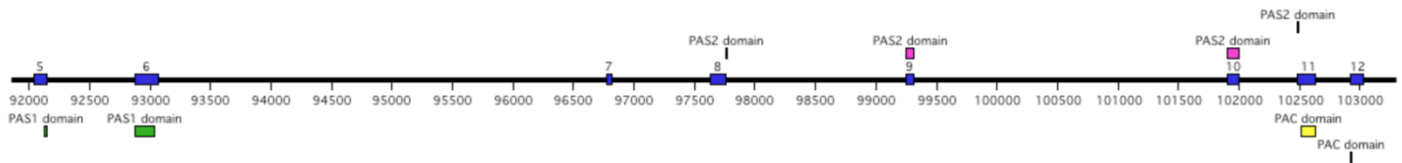

**B** loxP

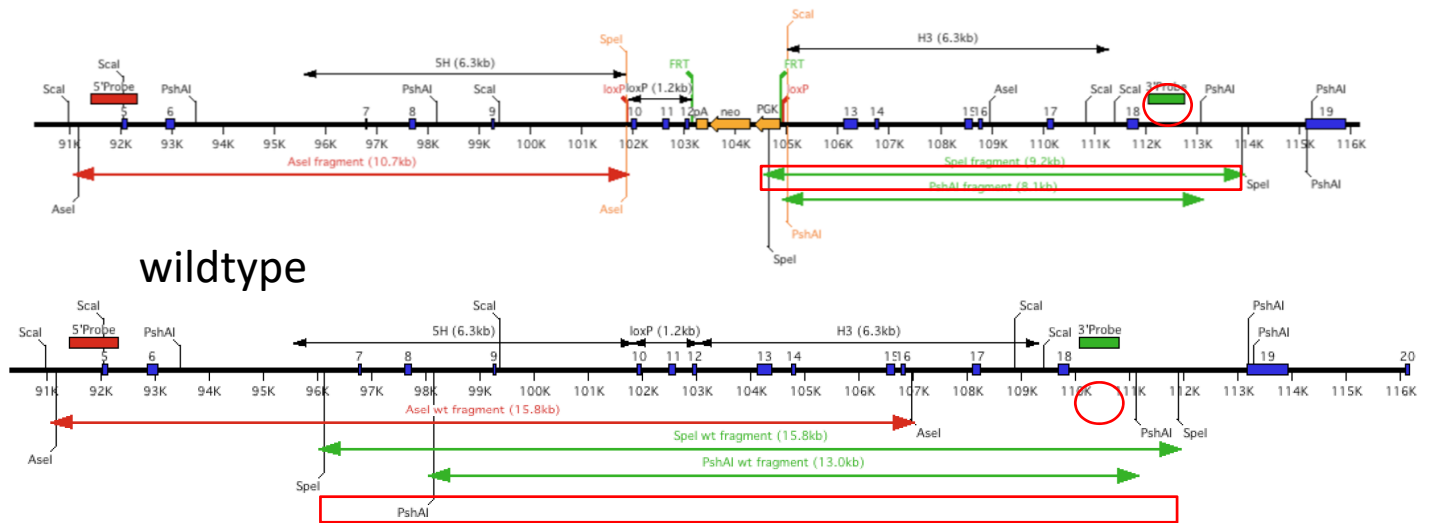

**C**

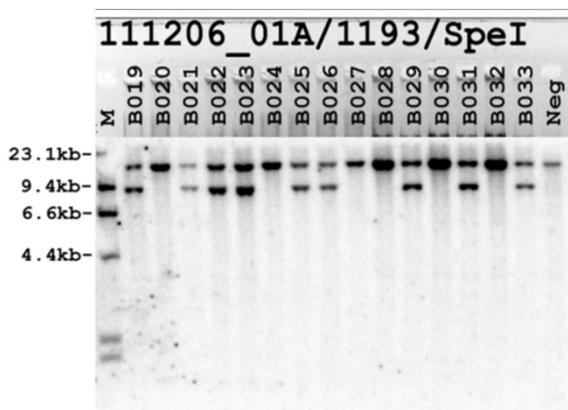

**D**  
loxP  
Cre pos  
KO

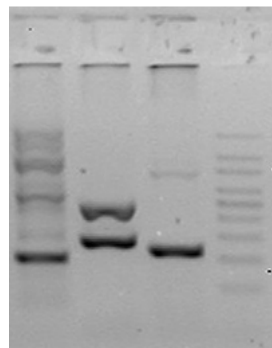

Aorta from  $Per2^{loxP/loxP}$ -VE-Cadherin-Cre

**Figure S2. Related to Figure 3. (A)**  $Per2^{loxP/loxP}$ -strategy: deletion of exons 10, 11 and 12 in the  $Per2$  gene removes half of the PAS2 domain and all of the PAC domain. This deletion also results in a frameshift mutation introducing an early stop codon. **(B)** Screening strategy. **(C)** Screening: DNA was digested with *SpeI* and probed with the P3 probe. These mice were the result of a wt (wildtype) /loxP x C57BL/6J mating. The expected sizes were: wildtype 15.8kb and loxP 9.2kb. Correct integration was confirmed by full sequencing. **(D)** PCR-Genotyping of aortic tissue from a  $Per2^{loxP/loxP}$ -VE-Cadherin-Cre mouse.

# Figure S3

**A**

## Murine *Angptl4* promoter regions

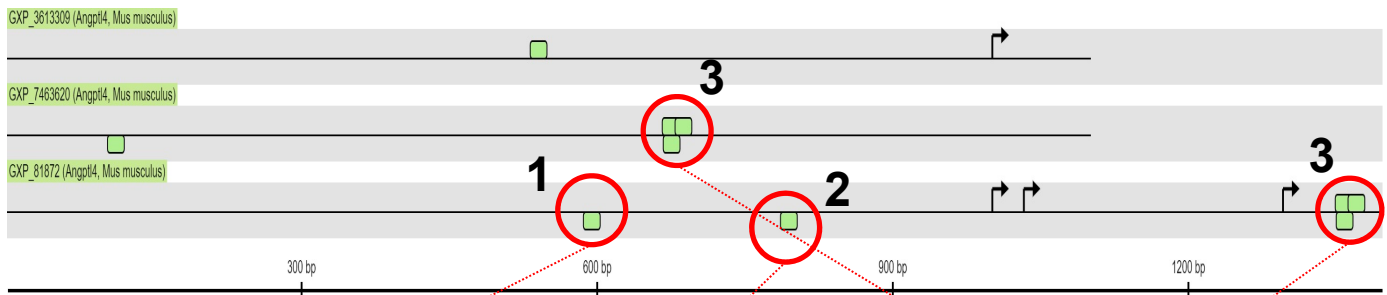

**B**

Matrix: V\$**ARNTL.01**  
 Family: V\$HIF  
 Matrix Similarity: 0.945  
 Position: 586 - 602  
 Genomic Position: chr 17:  
 33781974 - 33781990  
 Sequence:  
 caga**gttaCGTG**gcaga

**C**

Matrix: V\$**HRE.03**  
 Family: V\$HIF  
 Matrix Similarity: 0.943  
 Position: 786 - 802  
 Genomic Position: chr  
 17: 33781774 -  
 33781790  
 Sequence:  
 ataagcg**ACGTg**actgt

**D**

Matrix: V\$**ARNT.01**  
 Family: V\$HIF  
 Matrix Similarity: 0.95  
 Position: 1349 - 1365  
 Genomic Position: chr 17:  
 33781211 - 33781227  
 Sequence: cgcgaa**caCGTG**gagcg

Matrix: V\$**CLOCK\_BMAL1.01**  
 Family: V\$HIF  
 Matrix Similarity: 0.94  
 Position: 1350 - 1366  
 Genomic Position: chr 17:  
 33781210 - 33781226  
 Sequence: gcgctc**CACGTg**ttcgc

Matrix: V\$**HIF1.02**  
 Family: V\$**HIF**  
 Matrix Similarity: 0.931  
 Position: 1362 - 1378  
 Genomic Position: chr 17: 33781198  
 - 33781214  
 Sequence: agcgcacc**CGTG**ggcag

**Figure S3. Related to Figure 3. (A)** Mouse *Angptl4* promoter regions (Genomatix). HIFF family binding sites are depicted by green boxes. **(B-D)** Primers for the ChIP assay covered the regions marked with a red circle (*Angptl4*-HRE1-3, see Figure 3).

# Figure S4

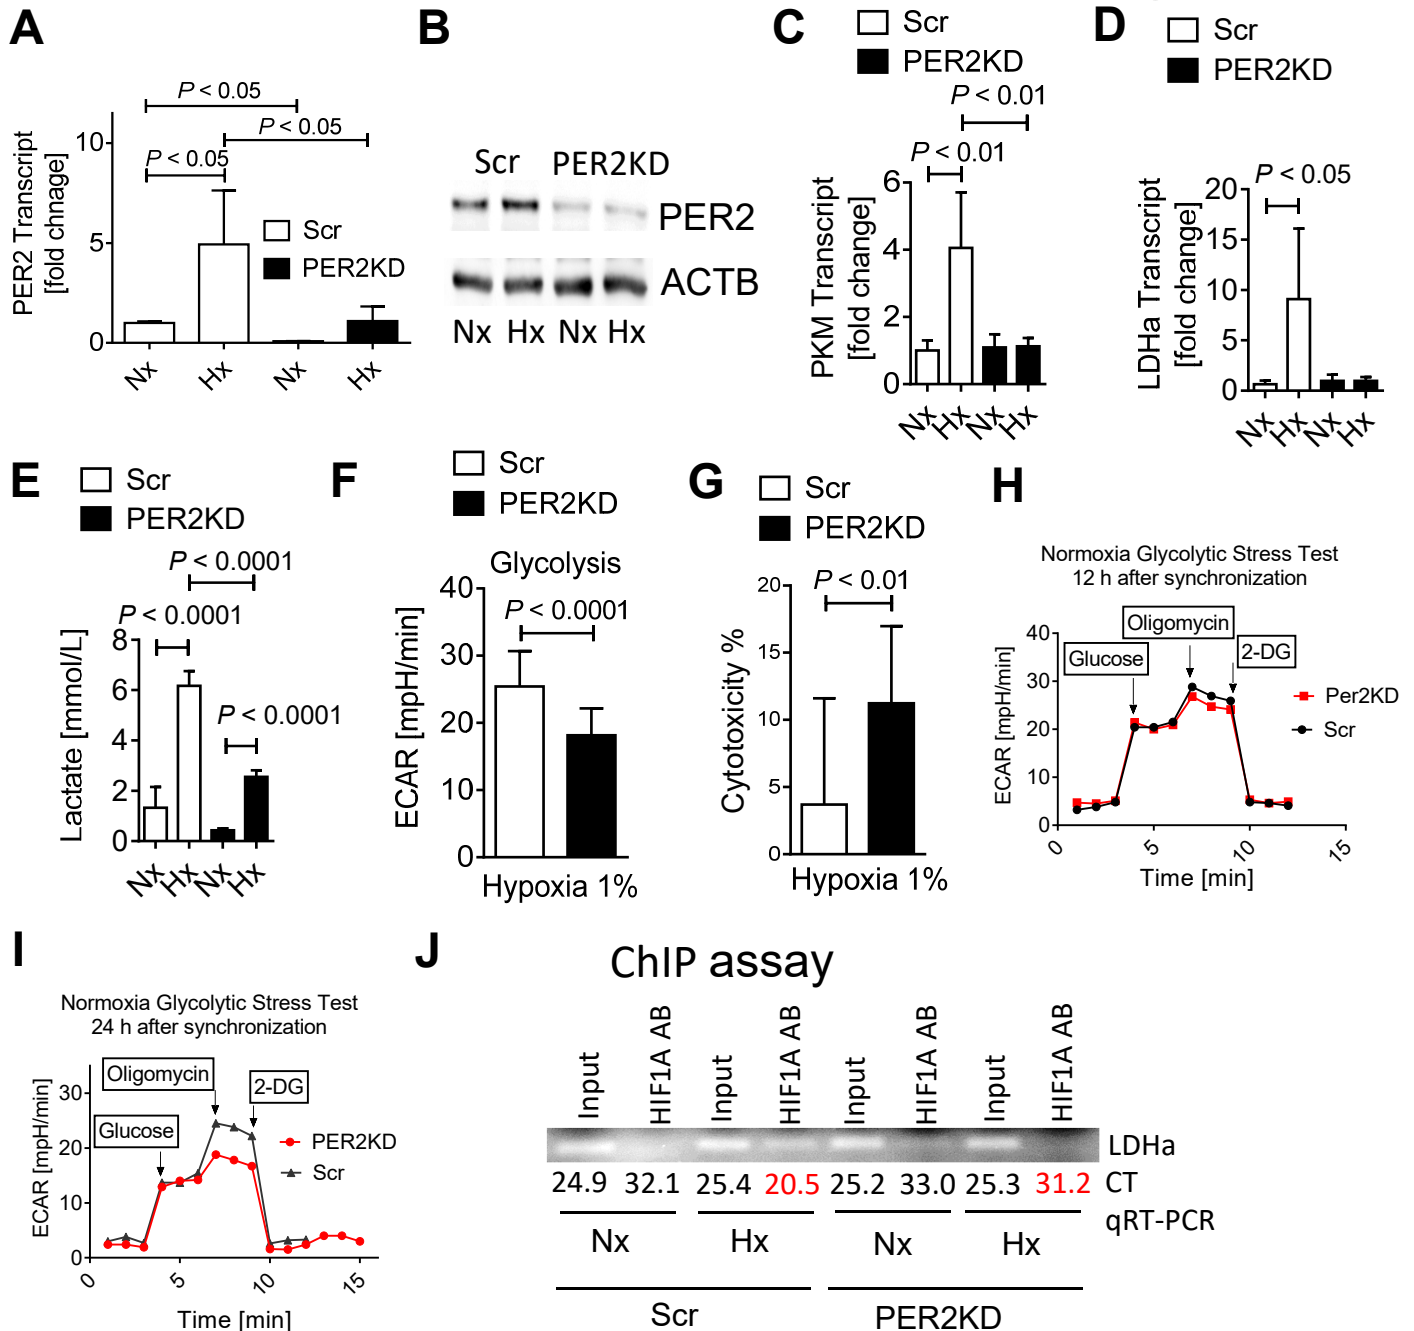

**Figure S4. Related to Figure 4.** HMEC-1 controls (Scr; treated with lentiviral scrambled shRNA) or HMEC-1 PER2 knockdown (KD; treated with lentiviral PER2 shRNA) were synchronized via serum starvation and exposed to 24 h of normoxia (Nx) or 1% hypoxia (Hx) in all experiments unless specified otherwise. (A, B) PER2 transcript or protein levels (mean±SD, n=3). (C, D) Transcript expression of pyruvate kinase (PKM) or lactate dehydrogenase (LDHa) (mean±SD, n=3). (E) Lactate levels in cell supernatants (mean±SD, n=3). (F) Glycolytic stress test (mean±SD, n=10). (G) LDH-Cytotoxicity (mean±SD, n=10). (H, I) Glycolytic stress tests 12 or 24h after cell synchronization (mean±SD, n=10) under normoxic conditions. (J) Chromatin immunoprecipitation (ChIP) analysis to detect HIF1A protein binding to the human LDHa promoter. qRT-PCR for the human LDHa promoter was performed for quantification. PCR products analyzed on a 2% agarose gel (top, **not** quantitative) or quantitative CT values from the qRT-PCR are shown (bottom, n=3).

# Figure S5

## PER2-Normoxia-only-Pathways

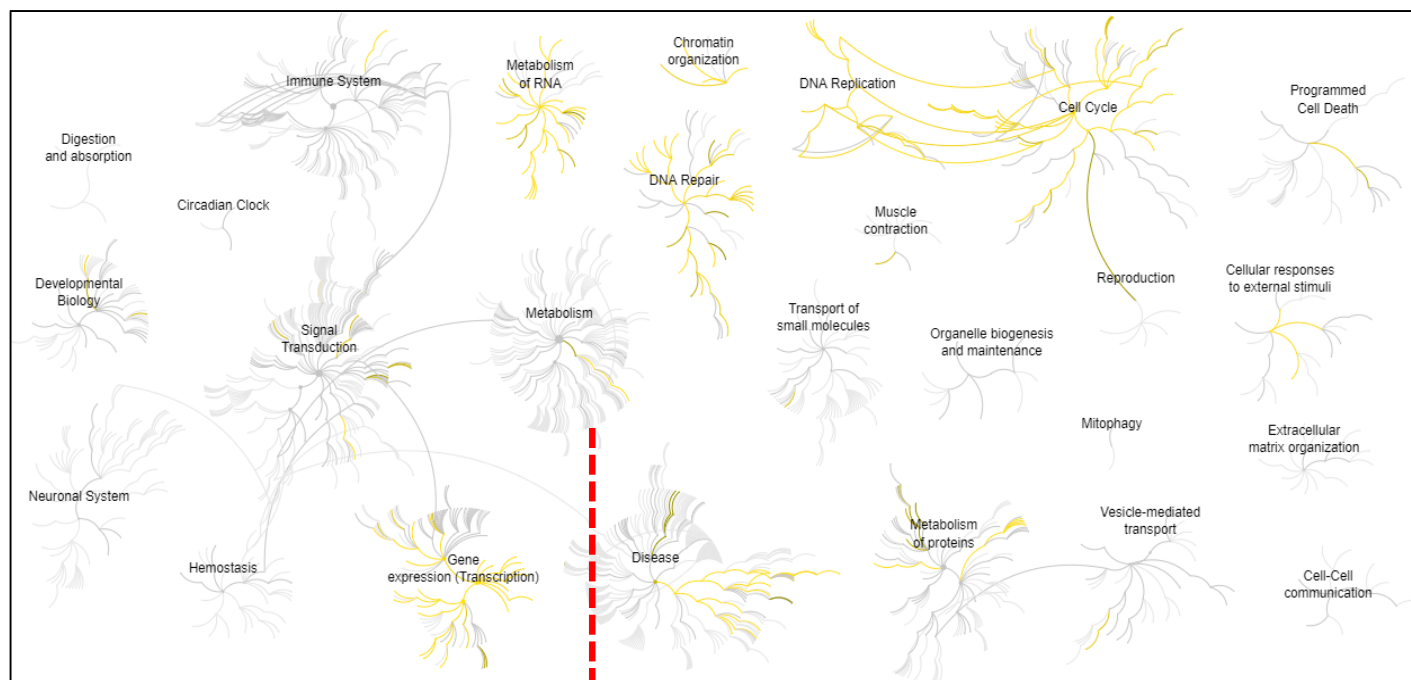

## PER2-All-Hypoxia-Pathways

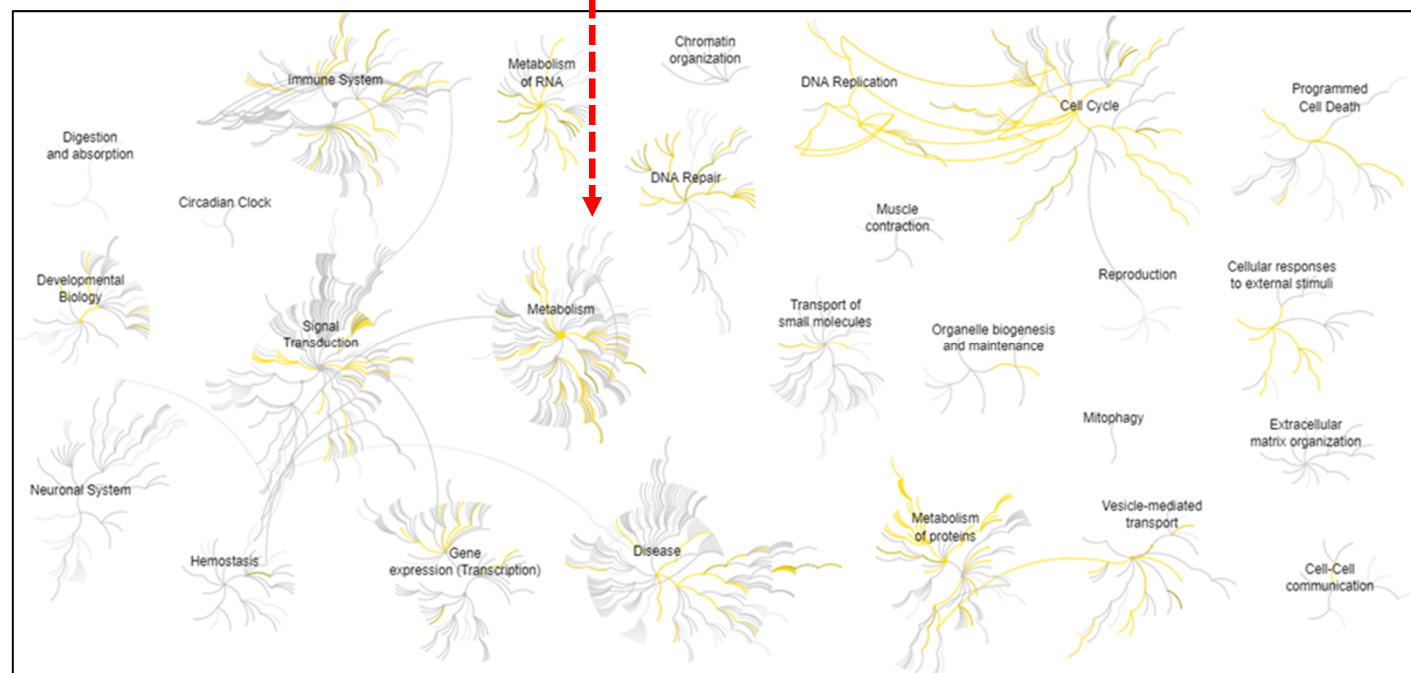

**Figure S5. Related to Figure 4. PER2-Normoxia-Hypoxia-Pathways.** *Reactome* analysis of an affinity purification–mass spectrometry-based proteomics from hypoxic HMEC-1 cells, indicating as strong involvement of PER2 in metabolic pathways under hypoxia. Yellow depicts PER2 pathways in comparison to all available *Reactome* pathways (grey).

# Figure S6

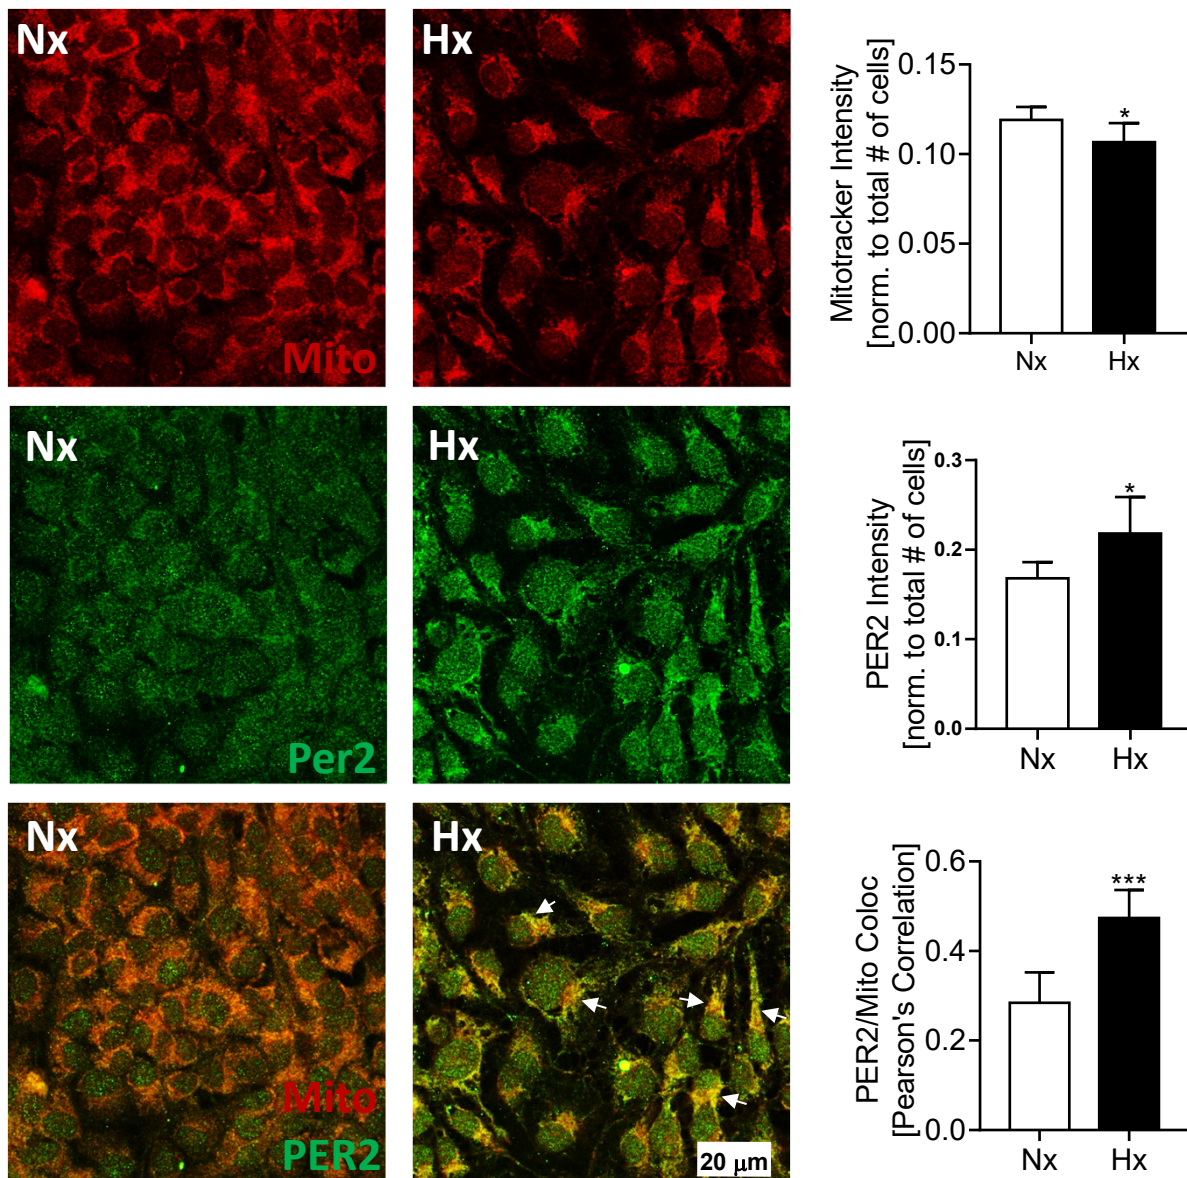

**Figure S6. Related to Figure 4.** Colocalization of PER2 and mitochondria (upper panel: MitoTracker Red CMXRos staining (red), middle panel: PER2 staining (green), lower panel: overlay MitoTracker Red and PER2 staining). Shown are staining from HMEC-1 cells after 24h of normoxia or 24h of hypoxia 1%. White arrows indicate mitochondrial translocation of PER2 (yellow, mean $\pm$ SD, n=6, \*= $P$ <0.05, \*\*\*=  $P$ <0.001).



# Figure S7

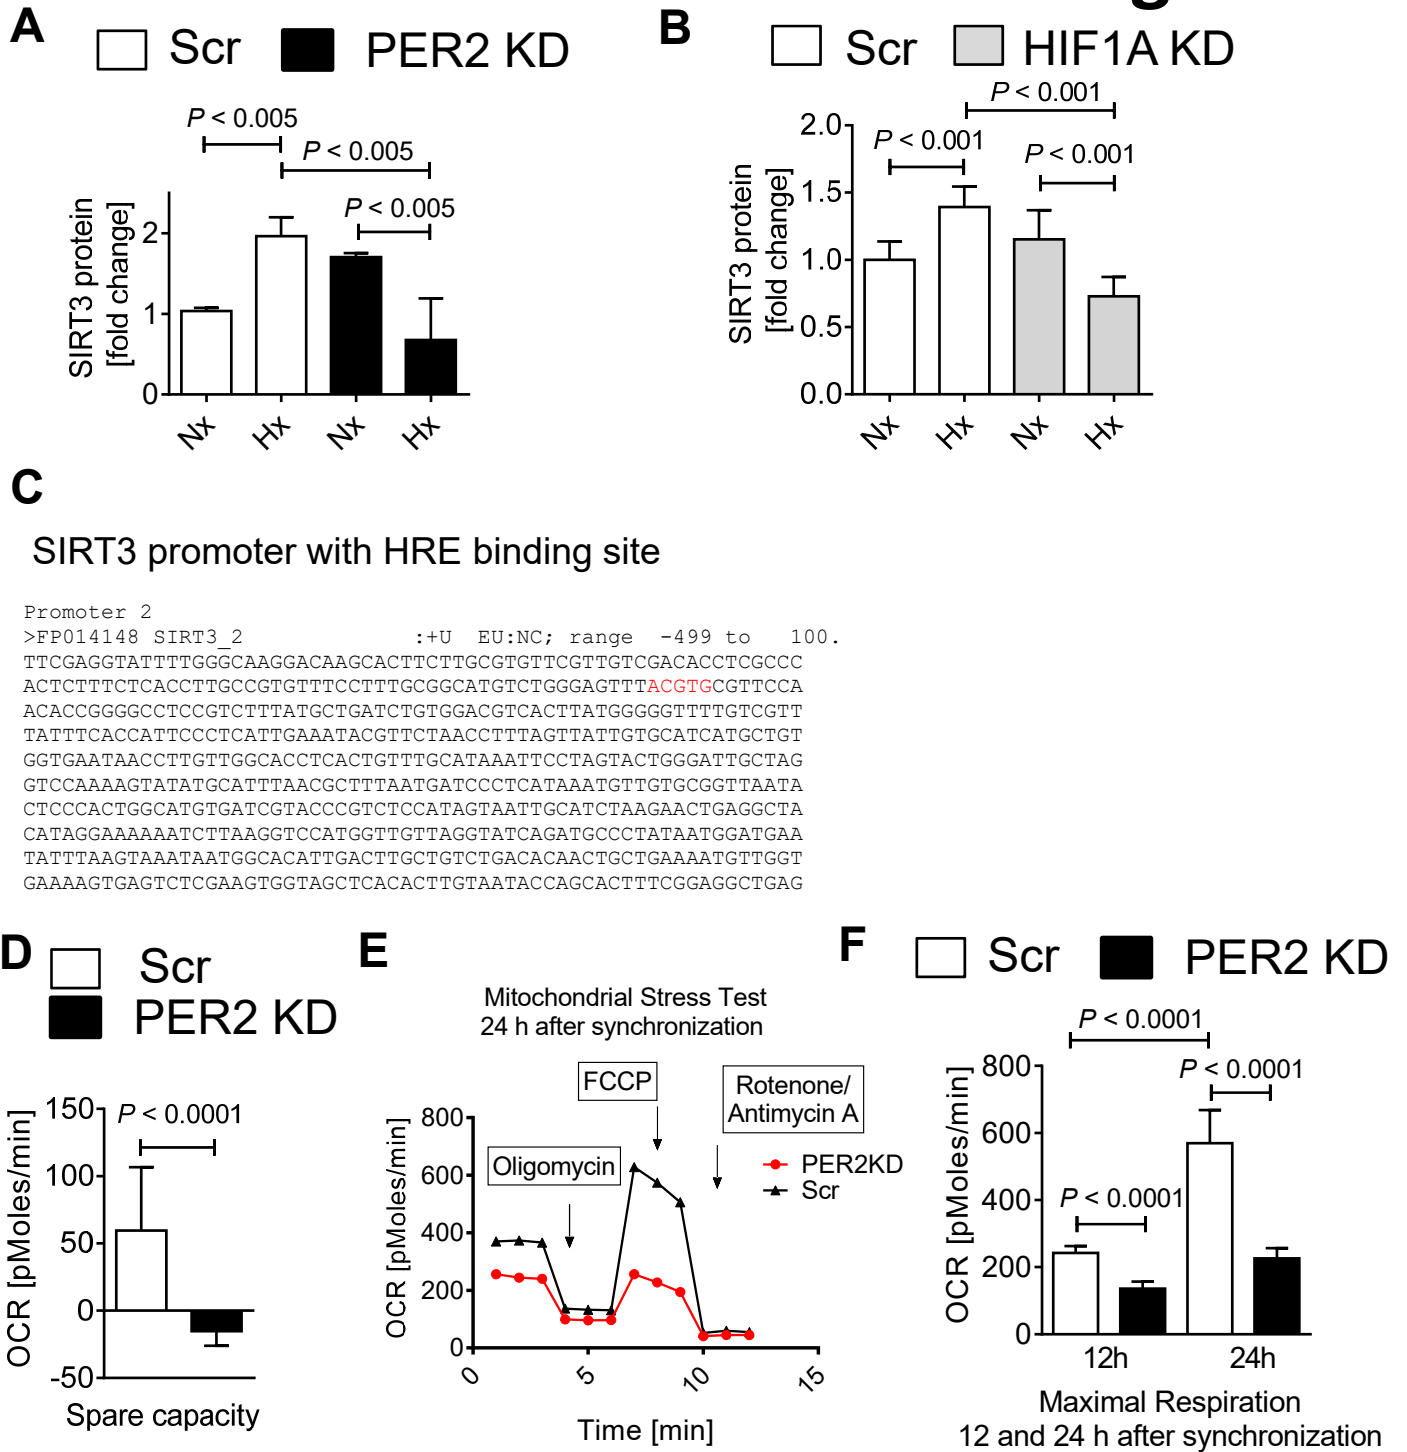

**Figure S7. Related to Figure 4 and Figure 5. (A)** Quantification of SIRT3 protein from PER2 KD or Scr control HMEC-1 in Hx (hypoxia 1%) or Nx (normoxia; mean±SD, n=5). **(B)** Quantification of SIRT3 protein from HIF1A KD or Scr control HMEC-1s in Hx or Nx (mean±SD, n=5). **(C)** Region of the human SIRT3 promoter containing a hypoxia response element (HRE) binding site (red). **(D)** Mitochondrial stress test in PER2 KD or Scr control HMEC-1 measuring spare capacity 12 h after cell synchronization (mean±SD, n=10). **(E, F)** Mitochondrial stress test administered at 24h after cell synchronization in PER2 KD or Scr control cells (mean±SD, n=5). Differences in maximal respiration between time point 12 and 24h are quantified in **(F)**.

# Figure S8

**A**

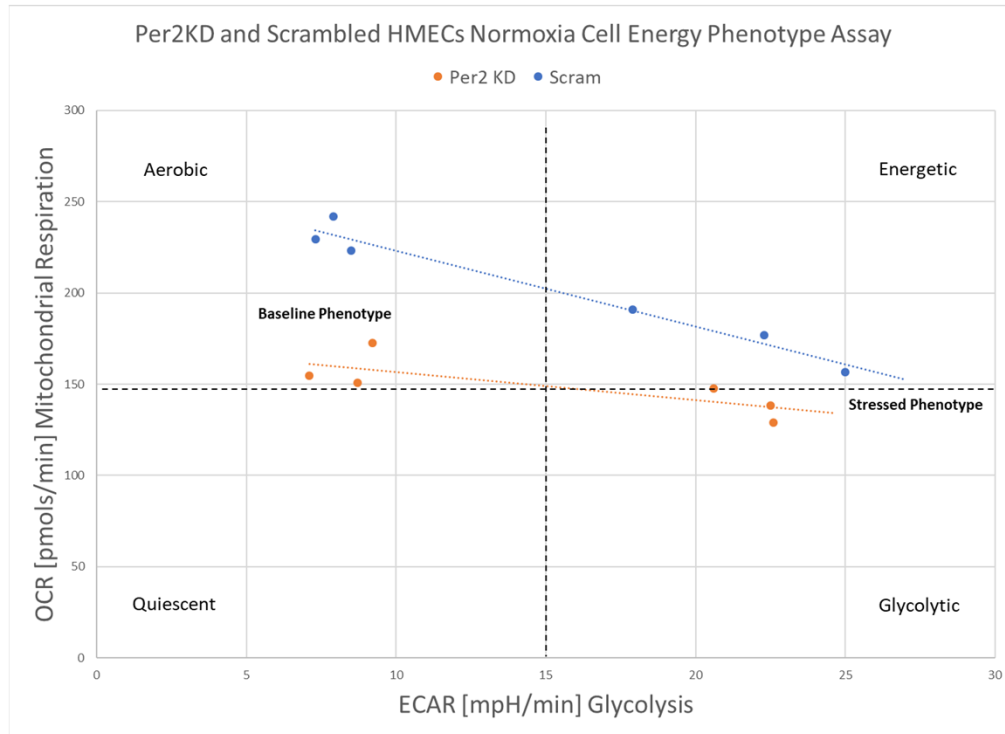

**B**

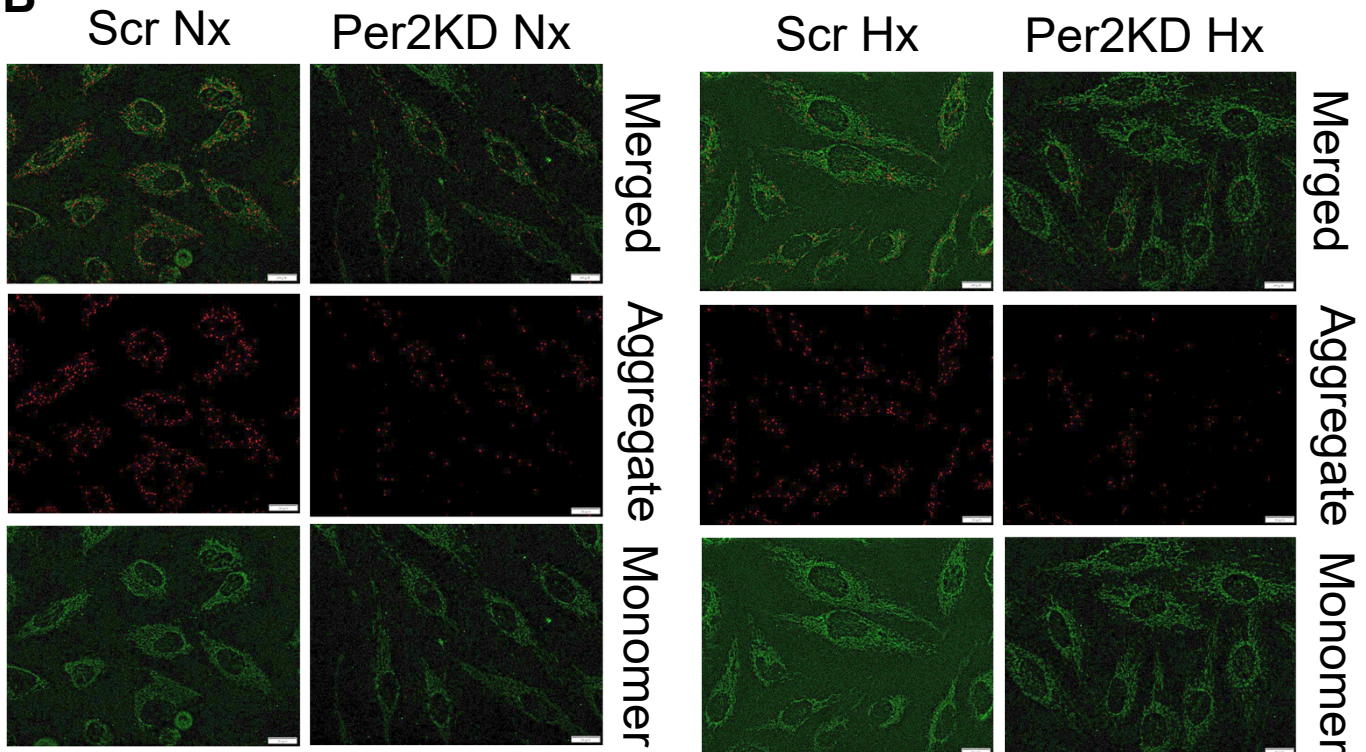

**Figure S8. Related to Figure 5. (A)** Cell energy phenotype test using the Seahorse Bioanalyzer in PER2 KD or Scram control HMEC-1 at baseline. Quiescent phenotype = cell not energetic for either metabolic pathway; energetic phenotype = cell uses both metabolic pathways; aerobic phenotype = cell uses predominantly mitochondrial respiration; and glycolytic = cell uses predominantly glycolysis (mean±SD, n=10). **(B)** JC-1 staining results from PER2 KD or Scr control HMEC-1s in Hx (hypoxia, 1%) or Nx (normoxia). Aggregate represents hyperpolarized cells and monomer represents depolarized cells (mean±SD, n=3, white scale bar=20µm).

# Figure S9

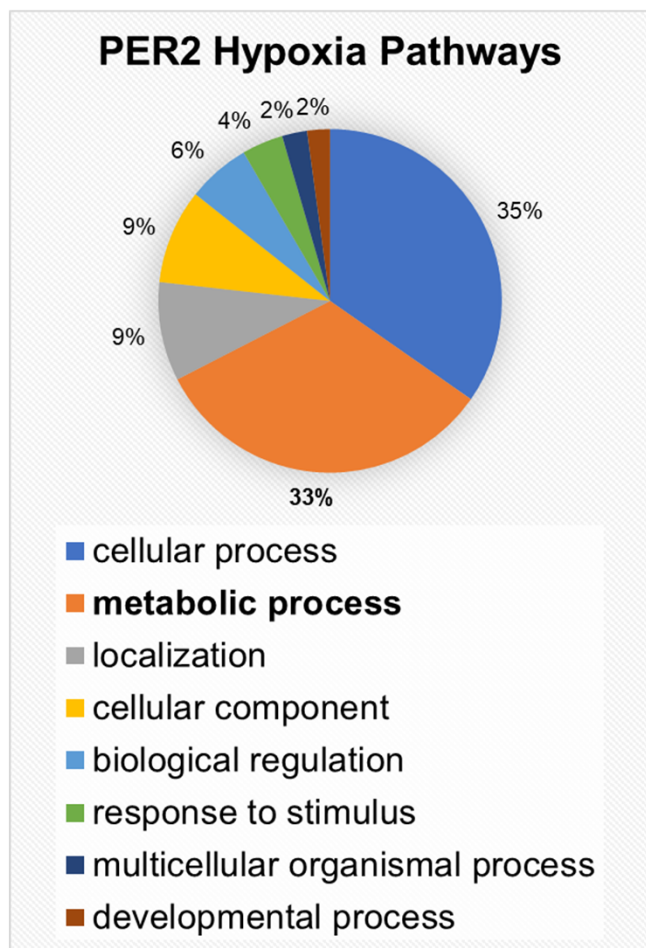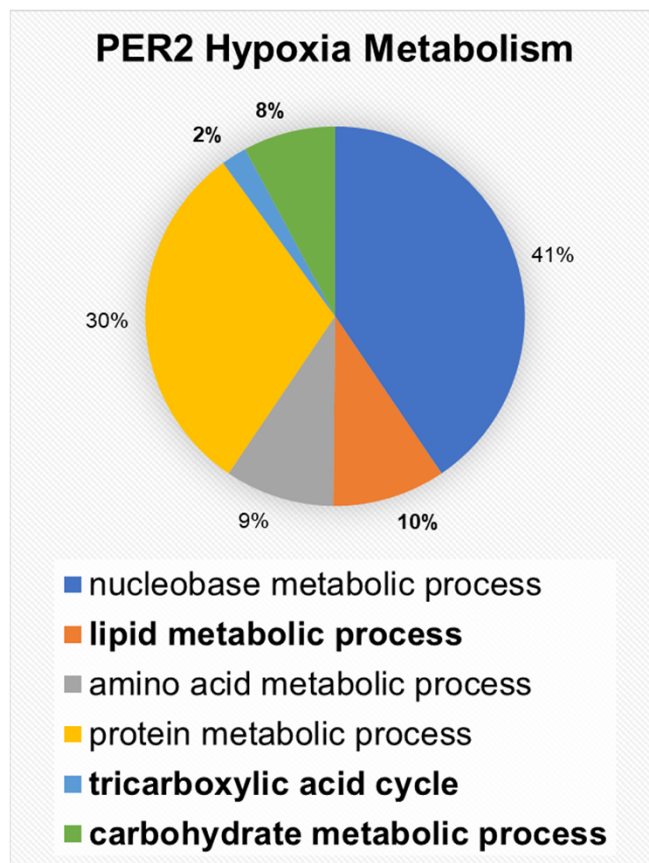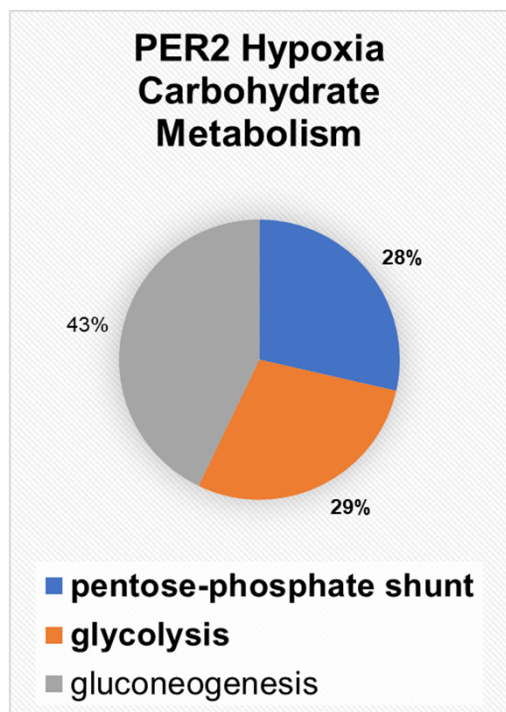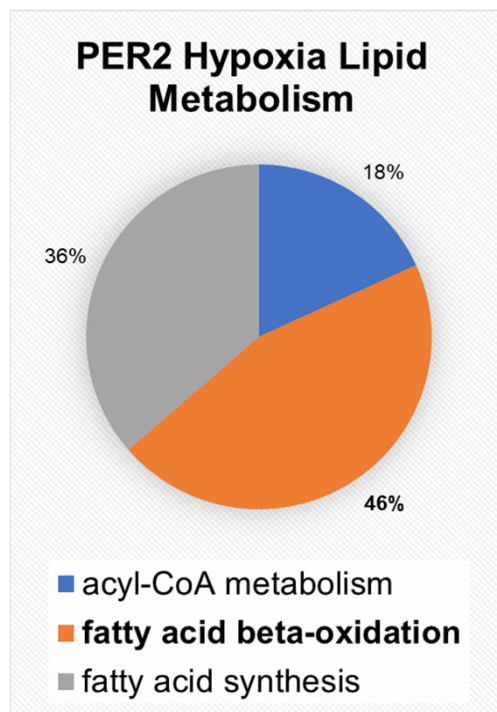

**Figure S9. Related to Figure 5.** PER2-Hypoxia-only-Pathways. PANTHER (Protein ANalysis THrough Evolutionary Relationships) analysis of an affinity purification–mass spectrometry-based proteomics from hypoxic HMEC-1 cells.





# Figure S11

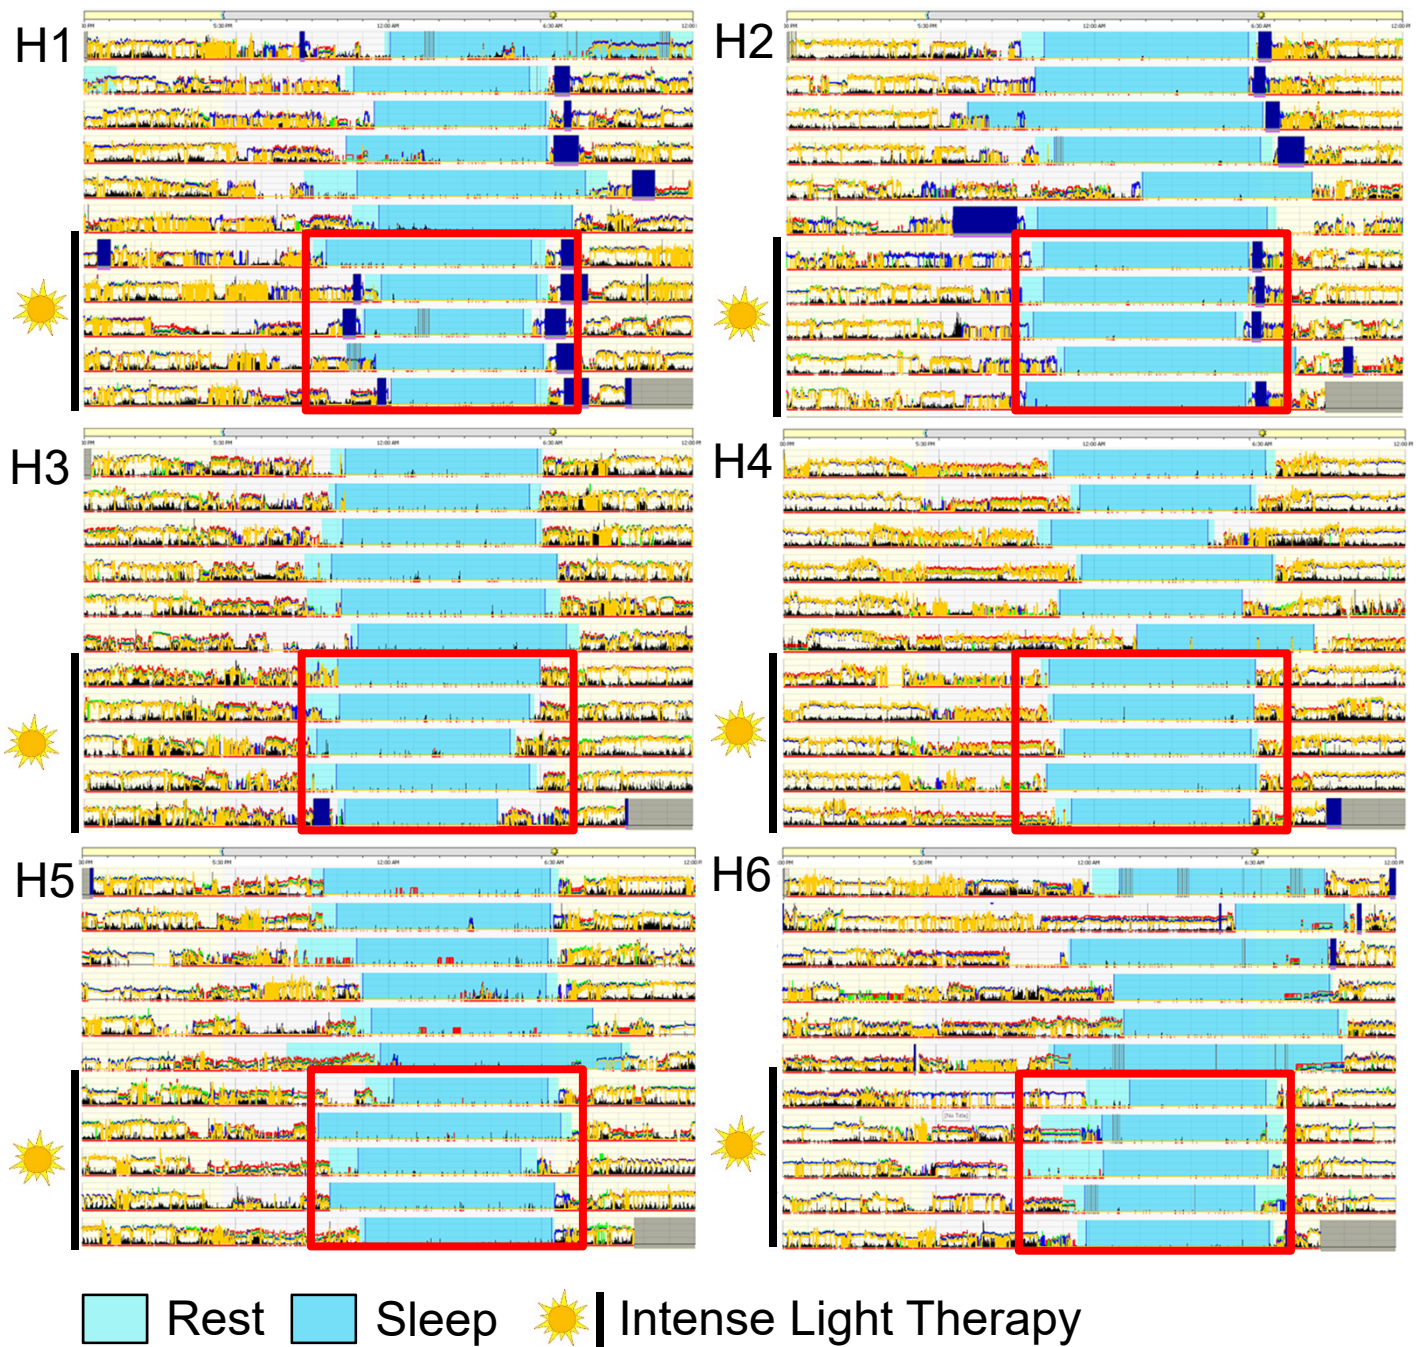

**Figure S11. Related to Figure 7.** Actigraphy data using a validated accelerometer (Actiwatch 2) from human healthy volunteers during 5 days without and 5 days with intense light therapy (30 min intense light from 8.30 – 9.00 AM; n=6, H=healthy volunteer; **Note:** synchronized sleep phases during intense light exposure [red square] vs no intense light therapy.
